# Supplementary material for: Quantitative Measurement of Spinal Cerebrospinal Fluid by Cascade Artificial Intelligence Models in Patients with Spontaneous Intracranial Hypotension
Source: MDPI journal article supplement (doi:10.3390/biomedicines10082049), 2022-08-22
Supplement: s1 [file s1]

**Table S1.** Demographics of patients and healthy volunteers.

|                                     | Total ( <i>n</i> = 25) | Patients ( <i>n</i> = 13, 52%) | HVs ( <i>n</i> = 12, 48%) | <i>p</i> value |
|-------------------------------------|------------------------|--------------------------------|---------------------------|----------------|
| Age at MRI examination <sup>a</sup> |                        | 43.31 ± 9.83                   | 37.17 ± 7.77              | 0.098          |
| Sex <sup>b</sup>                    |                        |                                |                           |                |
| Female                              | 8                      | 6                              | 2                         | 0.202          |
| Male                                | 17                     | 7                              | 10                        |                |

Mann-Whitney test <sup>a</sup>. Fisher's exact test <sup>b</sup>. Numeric data are presented as mean ± standard deviation. HVs healthy volunteers.
